# Supplementary material for: Iron gall ink revisited: hierarchical formation of Fe(iii)–tannic acid coacervate particles in microdroplets for protein condensation
Source: Royal Society of Chemistry journal article supplement (doi:10.1039/c8cc09507h), 2019-01-01
Supplement: c8cc09507h1.pdf [file c8cc09507h1.pdf]

## SUPPLEMENTARY INFORMATION

### **Iron gall ink revisited: hierarchical formation of Fe(III)–tannic acid coacervate particles in microdroplets for protein condensation**

Beom Jin Kim,<sup>a</sup> Jungkyu K. Lee<sup>b</sup> and Insung S. Choi<sup>\*a</sup>

<sup>a</sup> Center for Cell-Encapsulation Research, Department of Chemistry, KAIST, Daejeon 34141, Korea.

<sup>b</sup> Green-Nano Materials Research Center, Department of Chemistry, Kyungpook National University, Daegu 41566, Korea.

#### **Contents**

- Experimental Details.
- **Fig. S1** Formation of PEG/dextran LLPS microdroplets with FeCl<sub>3</sub> and TA.
- **Fig. S2** Distribution of the Fe(III)-TA complex in PEG and dextran biphasic solutions.
- **Fig. S3** DIC image of Fe(III)-TA particles in dried microdroplets.

## Experimental Details

**Materials.** Tannic acid (TA, Sigma), iron(II) chloride tetrahydrate ( $\text{FeCl}_2 \cdot 4\text{H}_2\text{O}$ , 98%, Sigma), iron(III) chloride hexahydrate ( $\text{FeCl}_3 \cdot 6\text{H}_2\text{O}$ ,  $\geq 98.0\%$ , Sigma), dextran (500 kDa, Spectrum Chemical), poly(ethylene glycol) (PEG, 20 kDa, Sigma), hexadecane (99%, Sigma), sorbitan monooleate (Span 80, Sigma), fluorescein isothiocyanate-dextran (dextran-FITC, 500 kDa, Sigma), rhodamine B-labeled polyethylene glycol (PEG-RhoB, 10 kDa, Nanocs Inc.), Alexa Fluor 647-conjugated albumin from bovine serum (BSA-Alexa Fluor 647, Life Technologies) were used as received. Deionized (DI) water ( $18.3 \text{ M}\Omega \cdot \text{cm}$ ) from Milli-Q Direct 8 (Millipore) was used.

**Formation of PEG/Dextran LLPS.** The iron (Fe) solution was prepared by dissolving  $\text{FeCl}_2$  (or  $\text{FeCl}_3$ ) in the aqueous PEG solution (14% w/v) to the final concentration of 1 mM, and the TA solution by dissolving TA in the aqueous dextran solution (15% w/v) to the final concentration of 10 mM. For visualization of the PEG/dextran LLPS, PEG-RhoB or dextran-FITC was used with the concentration of 1% (w/w). Hexadecane containing 5 wt% Span<sup>®</sup> 80 was used as the continuous phase in the microfluidic channel. Microdroplets were generated by flowing the PEG and dextran solutions at the speed of 1  $\mu\text{L}/\text{min}$  into two middle channels of a flow-focusing microfluidic device (Dolomite) with the continuous phase of hexadecane (6  $\mu\text{L}/\text{min}$ ). After being collected to a microtube containing hexadecane, the microdroplets were incubated at room temperature overnight. For protein condensation, BSA-Alexa Fluor 647, as a protein model, was added to a PEG solution at the concentration of 1.0 mg/mL.

**Characterizations.** Optical micrographs were taken with a DMI3000B inverted microscope (Leica). DIC and CLSM imaging was performed with a LSM 700 confocal microscope (Carl Zeiss). The data on average diameters and fluorescence intensity profiles were obtained by Image J (NIH).

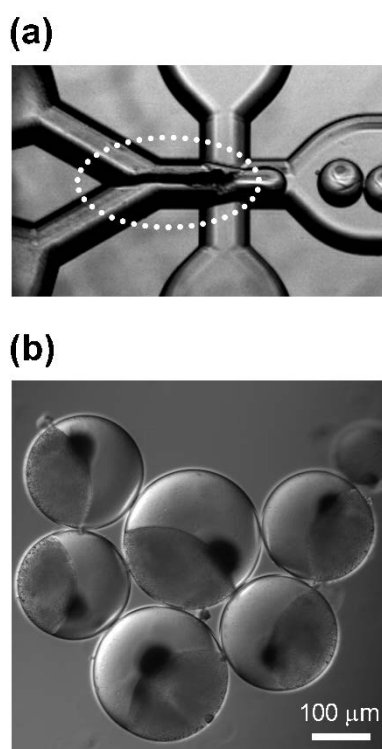

**Fig. S1** (a) Optical image of a microfluidic junction clogged by uncontrollable formation of Fe(III)-TA complexes, when FeCl<sub>3</sub> was used. The dotted white ellipsoid shows that the Fe(III)-TA complex was formed uncontrollably in the channel. (b) DIC image of polydisperse microdroplets, when FeCl<sub>3</sub> was used.

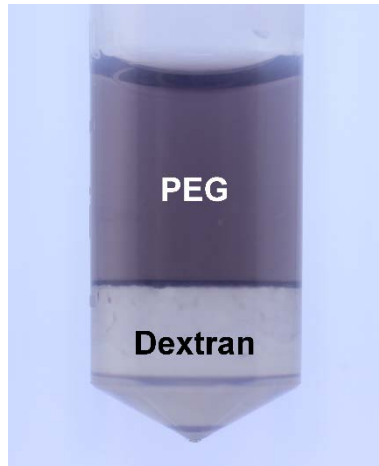

**Fig. S2** Optical image of aqueous PEG and dextran biphasic solutions. The purple color of the PEG phase indicates that TA in the dextran phase moved into the PEG phase.

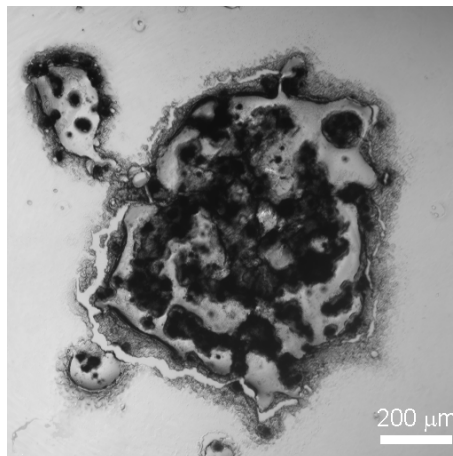

**Fig. S3** DIC image of the Fe(III)-TA particles in the dried microdroplets. The non-spherical shapes of the particles imply that the particles are liquid-like.
